# Supplementary material for: Mutant glucocorticoid receptor binding elements on the interleukin-6 promoter regulate dexamethasone effects
Source: Springer Nature journal article supplement (doi:10.1186/s12865-021-00413-z), 2021-03-26
Supplement: MOESM1 [file 19010456]

Human CAAGACATGCCAAA**GTGCTGAGTC**ACTAATAAAGAAAAAAGAAAAGTAAAGGAAGAGTGTTCTGCTTCTTAGCGCTAGCCCTCAATGACGACCTAAAGCT -265  
 Monkey CAAGACATGCCAAA**GTGCTGAGTC**ACTAATAAAGAAAAAAGAAAAGTAAAGGAAGAGTGATTCTGCTTCTTAGCGCTAGCCCTCAGTGACGACCTAAAGCT -262  
 Horse CAAGACGTGCCAAA**GTGCTGAGTC**ACA--AAAAGGAAGAAAAGTAA-----GTGA----GCTTCTTAGGGCTACGCTT-GTAATGACCTAAAGCG -265  
 Mouse CAAGACATGCTCA**AGTGCTGAGTC**ACTTTTAAAGAAAAAAGAAAAGTAA-----GTGCTCATGCTTCTTAGGGCTAGCCCTCAAGGATGACTTAAGCG -257  
 Rat CAAG--TGCTCA**AGTGCTGAGTC**ACTTTTAAAGAAAAGAAA--AAGA-----GTGATCAGGCTTCTTAAGGATAGCCCTCAAGGATGACTTAAGC -267

AP-1

GR1

Human **GCAC**TTTTCCC--CCTAGTTGTG--TCTTGC**ATGCTAAAGGACGTC**ACATTGCACAATC-TTAATAAGGTTTCCAATCAGCCCAACCCGCTCTGGCCC -170  
 Monkey **GCAC**TTTTCCC--CCTAGTTGAG--TCTTGC**ATGCTAAAGGACGTC**ACATTGCACAATC-TTAAT--GTTTCCAATCAGCCCAACCCGCTCTGGCCC -170  
 Horse **GCAC**TTTTTCC--CC-GGTTGTGATTCTTGTGATGCTAAAGGACGTCACATTGCACAATCTTAAATAAGGTTTCCAATCAGCCCAACCCGCTCTGGCCC -168  
 Mouse ACACITTTCCCTTCTAGTTGTGATTCTTTGATGCTAAAGGACGTCACATTGTGCAATC-TTAATAAGGTTTCCAATCAGCCCAACCCACTCTGGCCC -158  
 Rat ACACITTTCCCTCTAGCTGTGATTCTTTGATGCTAAAGGACGTCACATTGTGCAATC-TTAATAAGGTTTCCAATCAGCCCAACCCACTCTGGCCC -168

GR2/CREB

GR3/NF-1L6

Sp1

Sp1

Human ACCCTCACCTCCAACAAAGATTT--ATCAAAT**GTGGATT**TTCCCATGAGTCTCAATATTAGAGTCTCAACCCCAATAAATATAGCACTGGAGATGTC -72  
 Monkey ACCCTAACCTCCAACAAAGATTT--ATCAAAT**GTGGATT**TTCCCATGAGTCTCAATATTAGAGTCTCAACCCCAATAAATATGAGACTGGAGATGTC -72  
 Horse ACCCCACCTCCAACAAAGATTT--ATCAAAT**GTGGATT**TTCCCATGAGTCTCAATATTAGAGTCTCAACCCCAATAAATATGAGACTGGGGATGTC -70  
 Mouse ACCCCACCTCCAACAAAGATTTTATCAAAT**GTGGATT**TTCCCATGAGTCTCAAAATTAGAGAGTTGACTCCTAATAAATATGAGACTGGGGATGTC -58  
 Rat ACCCCACCTCCAACAAAGATTTTATCAAAT**GTGGATT**TTCCCATGAGTCTCAAAAGTAGAGAGTGGACTCCCAATAAATATGAGACTGGGGATGTC -68

NF-κB

GR4

Human TGAGGCTCATTCGCCCTCGAGGCCACCGGGAA**CGAAAGAGA**AGCTCTATCTGCCCTCCAGGAGCCAGCT**ATGA**ACTCCTTCTCCAA +19  
 Monkey TGAGGCTCATTCGCCCTCGAGGCCACCAGGAACGAAAGAGAAGCTCTATCTGCCCTCCAGGAACCCAGAT**ATGA**ACTCCGCTCCAA +19  
 Horse TGAGGCTCATTCGCCCTCGAGGCCACCAGGAACGAAAGAGA-GCTTCATCTGCCCTCCAG-AACCCAGCT**ATGA**ACTCCTTCTCCAA +19  
 Mouse TGTAGCTCATTCGCTCTCGAGGCCACCAAGAACGATAGTCA-ATTCCA-----GAAACC--GCT**ATGA**AGTTTCTCTCCAA +19  
 Rat TGTAGCTCATTCGCTCTCGAGGCCACCAGGAACGAAAGTCA-ACTCCATCTGCCCTCCAGGAACA--GCT**ATGA**AGTTTCTCTCCAA +19

GR5
